# Supplementary figures and images for: Birth anthropometry among three Asian racial groups in Singapore: proposed new growth charts
Source: HighWire-hosted journal article supplement (doi:10.1136/archdischild-2022-324693), 2023-01-02

### Singapore Birth Anthropometry Chart - Girls

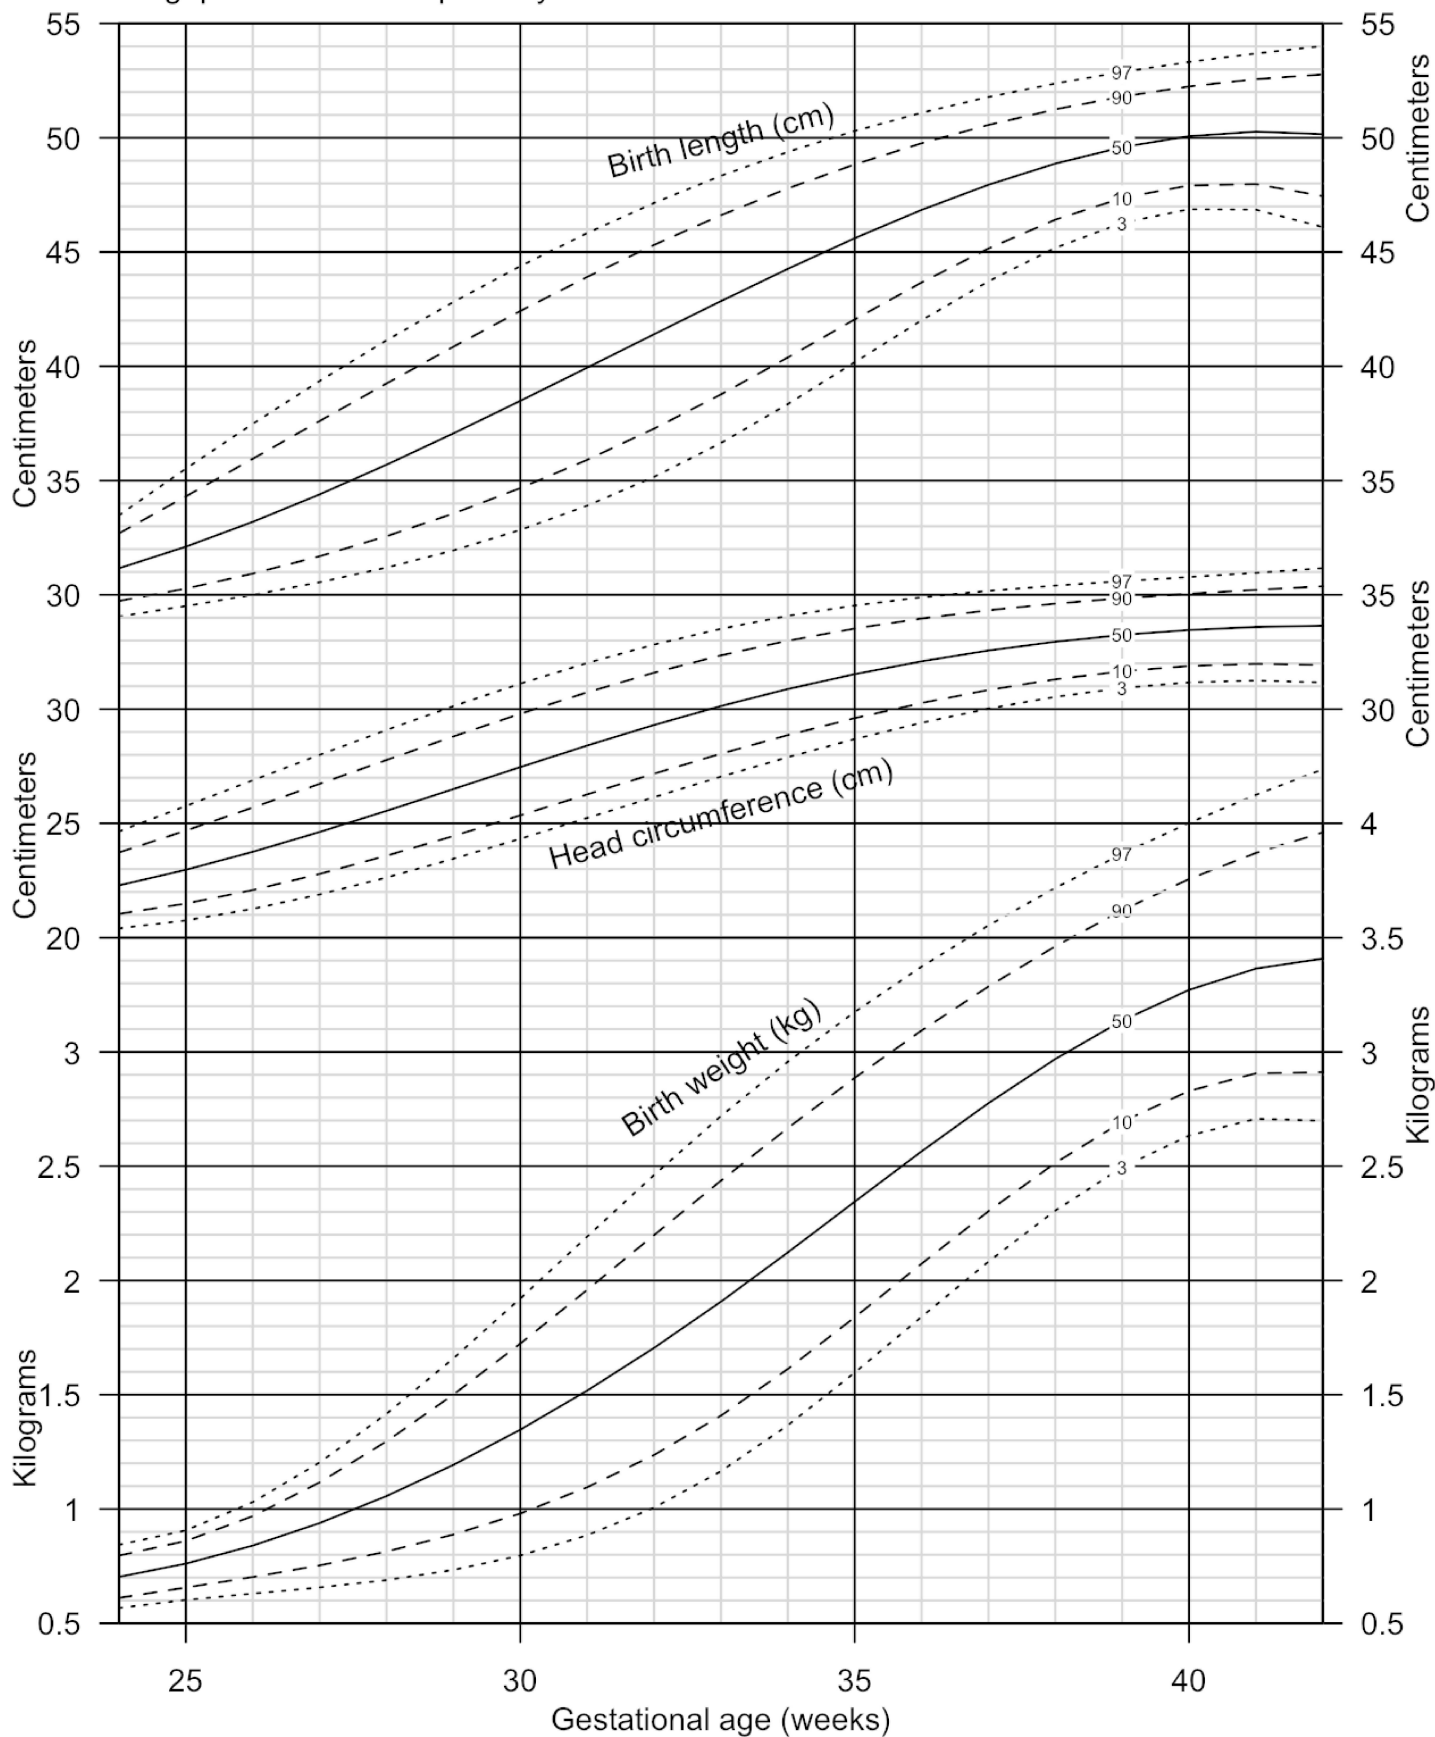

Supplement: archdischild-2022-324693supp004_data_supplement.pdf [file archdischild-2022-324693supp004_data_supplement.pdf]
